# Supplementary material
Source: Springer Nature journal article supplement (https://www.springermedizin.de/resource/supplementary/12883_2013_898_MOESM1_ESM.pdf/9456108)

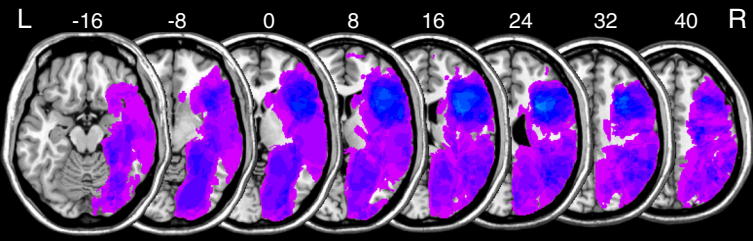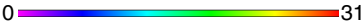

Supplement: MOESM1 [file 9456108]
